# Supplementary material for: One-pot spatial engineering of multi-enzymes in metal–organic frameworks for enhanced cascade activity
Source: Royal Society of Chemistry journal article supplement (doi:10.1039/d4ta06211f), 2024-01-01
Supplement: d4ta06211f1.pdf [file d4ta06211f1.pdf]

## Supporting information

### One-pot spatial engineering of multi-enzymes in metal-organic frameworks for enhanced cascade activity

Wenqing Fan<sup>a</sup>, Kang Liang<sup>a,b\*</sup>, Jieying Liang,<sup>a\*</sup>

<sup>a</sup>School of Chemical Engineering, Australian Centre for NanoMedicine, The University of New South Wales, Sydney, NSW 2052, Australia

<sup>b</sup>Graduate School of Biomedical Engineering, The University of New South Wales, Sydney, NSW 2052, Australia

Email: [kang.liang@unsw.edu.au](mailto:kang.liang@unsw.edu.au), [jieying.liang@unsw.edu.au](mailto:jieying.liang@unsw.edu.au)

## 1. Tables and Figures

**Table S1** Enzyme loading efficiency of biocomposites.

| <b>GOx/HRP model</b>              | <b>GOx loading efficiency (%)</b> | <b>HRP loading efficiency (%)</b> |
|-----------------------------------|-----------------------------------|-----------------------------------|
| GOx/HRP-PDADMAC@ZIF-8             | 6.0±0.80                          | 43.6±2.34                         |
| GOx-PDADMAC/HRP@ZIF-8             | 9.0±0.04                          | 30.4±0.43                         |
| GOx/HRP@ZIF-8                     | 6.8±0.34                          | 40.4±1.72                         |
| GOx-PDADMAC/HRP-<br>PDADMAC@ZIF-8 | 8.69±0.08                         | 36.40±0.32                        |
| <b>Pro/GOx model</b>              | <b>GOx loading efficiency (%)</b> | <b>Pro loading efficiency (%)</b> |
| Pro/GOx-PDADMAC@ZIF-8             | 5.85±0.80                         | 13.69±0.80                        |
| Pro-PDADMAC/GOx@ZIF-8             | 3.30±0.19                         | 13.50±0.79                        |
| Pro/GOx@ZIF-8                     | 6.15±0.10                         | 24.30±1.60                        |
| <b>Pro/ADH model</b>              | <b>Pro loading efficiency(%)</b>  | <b>ADH loading efficiency(%)</b>  |
| Pro/ADH-PDADMAC@ZIF-8             | 14.25±0.8                         | 18.75±0.98                        |
| Pro-PDADMAC/ADH@ZIF-8             | 14.40±0.53                        | 17.40±1.90                        |
| Pro/ADH@ZIF-8                     | 10.80±0.20                        | 18.15±0.20                        |

**Table S2** The catalytic kinetic parameters of enzyme-MOF.

| <b>Biocomposites</b>  | <b>K<sub>m</sub> (mM)</b> | <b>V<sub>max</sub><br/>(<math>\mu</math>M/min)</b> | <b>K (min<sup>-1</sup><math>\times</math>10<sup>-5</sup>)<br/>(V<sub>max</sub>/ K<sub>m</sub>)</b> | <b>K<sub>enzyme-MOF</sub>/K<sub>free</sub><br/>enzyme (Times)</b> | <b>Relative activity<br/>(Times)</b> |
|-----------------------|---------------------------|----------------------------------------------------|----------------------------------------------------------------------------------------------------|-------------------------------------------------------------------|--------------------------------------|
| <b>GOx/HRP model</b>  |                           |                                                    |                                                                                                    |                                                                   |                                      |
| GOx-PDADMAC/HRP@ZIF-8 | 1802.00                   | 22.31                                              | 1.24                                                                                               | 0.27                                                              | 1.72                                 |
| GOx-PDADMAC/HRP       | 915.70                    | 41.80                                              | 4.56                                                                                               |                                                                   |                                      |
| GOx/HRP-PDADMAC@ZIF-8 | 1754.00                   | 18.82                                              | 1.07                                                                                               | 0.22                                                              | 1.38                                 |
| GOx/HRP-PDADMAC       | 1018.00                   | 50.25                                              | 4.94                                                                                               |                                                                   |                                      |
| GOx/HRP@ZIF-8         | 275.90                    | 2.451                                              | 0.89                                                                                               | 0.16                                                              | 1.00                                 |
| GOx/HRP               | 784.60                    | 44.12                                              | 5.62                                                                                               |                                                                   |                                      |
| <b>Pro/GOx model</b>  |                           |                                                    |                                                                                                    |                                                                   |                                      |
| Pro-PDADMAC/GOx@ZIF-8 | 38.63                     | 2.21                                               | 5.72                                                                                               | 1.14                                                              | 1.69                                 |
| Pro-PDADMAC/GOx       | 23.69                     | 1.19                                               | 5.03                                                                                               |                                                                   |                                      |
| Pro/GOx-PDADMAC@ZIF-8 | 22.44                     | 1.13                                               | 5.02                                                                                               | 1.01                                                              | 1.50                                 |
| Pro/GOx-PDADMAC       | 26.77                     | 1.33                                               | 4.96                                                                                               |                                                                   |                                      |
| Pro/GOx@ZIF-8         | 31.33                     | 1.24                                               | 3.97                                                                                               | 0.68                                                              | 1.00                                 |
| Pro/GOx               | 25.25                     | 1.48                                               | 5.86                                                                                               |                                                                   |                                      |
| <b>Pro/ADH model</b>  |                           |                                                    |                                                                                                    |                                                                   |                                      |
| Pro/ADH-PDADMAC@ZIF-8 | 23.57                     | 35.88                                              | 152.23                                                                                             | 3.99                                                              | 14.85                                |
| Pro/ADH-PDADMAC       | 24.34                     | 9.29                                               | 38.20                                                                                              |                                                                   |                                      |
| Pro-PDADMAC/ADH@ZIF-8 | 31.60                     | 5.94                                               | 18.80                                                                                              | 0.44                                                              | 1.62                                 |
| Pro-PDADMAC/ADH       | 23.76                     | 10.26                                              | 43.24                                                                                              |                                                                   |                                      |
| Pro/ADH@ZIF-8         | 23.95                     | 3.23                                               | 13.54                                                                                              | 0.27                                                              | 1.00                                 |
| Pro/ADH               | 23.82                     | 11.96                                              | 50.23                                                                                              |                                                                   |                                      |

**Table S3** Proportional peak area summary of deconvoluted amide I region in enzyme-MOF versus free enzymes.

| <b>Biocomposites</b>  | $\alpha$ -helix (%) | $\beta$ -sheet (%) | intermolecular $\beta$ -sheet (%) | $\beta$ -turn (%) | random coil (%) |
|-----------------------|---------------------|--------------------|-----------------------------------|-------------------|-----------------|
| GOx/HRP               | 31.12               | 7.95               | 6.58                              | 15.11             | 39.24           |
| GOx-PDADMAC/HRP       | 31.23               | 17.10              | 13.75                             | 11.48             | 26.45           |
| GOx/HRP@ZIF-8         | 45.04               | 6.05               | 6.71                              | 24.22             | 17.98           |
| GOx-PDADMAC/HRP@ZIF-8 | 26.13               | 7.07               | 7.01                              | 33.94             | 25.84           |
| GOx/HRP-PDADMAC@ZIF-8 | 31.42               | 8.86               | 24.11                             | 27.90             | 7.70            |

**Table S4** Comparison of this work to other reported methods.

| MOF   | Enzymes                             | Method                                                                       | Enhanced activity                                                                | Ref.         |
|-------|-------------------------------------|------------------------------------------------------------------------------|----------------------------------------------------------------------------------|--------------|
| ZIF-8 | GOx, HRP, Pro, ADH                  | PDADMAC-modified enzyme induced core-shell structure                         | 1.69-14.85 times compared to unmodified bi-enzyme@ZIF-8.                         | This work    |
| ZIF-8 | GOx, HRP, Pro, ADH                  | Stepwise encapsulation of GOx and HRP by epitaxial shell-by-shell overgrowth | 0.9-15.4 times compared to GOx/HRP@ZIF-8 and Pro/ADH/NAD <sup>+</sup> @ZIF-8.    | <sup>2</sup> |
| ZIF-8 | GOx, HRP, $\beta$ -galactosidase    | Peptide-induced MOF super-self-assembly                                      | 4.4-7.3 times compared with the unassembled enzyme-MOF.                          | <sup>3</sup> |
| ZIF-8 | GOx, HRP                            | Microfluidic techniques                                                      | About 3 times compared with the bulk solution-synthesized enzyme-MOF composites. | <sup>4</sup> |
| ZIF-8 | GOx, Hemin                          | Dual confinement                                                             | 1.7 times compared to the GOx/Hemin@ZIF.                                         | <sup>5</sup> |
| ZIF-L | GOx, HRP, cofactor-dependent enzyme | Hollow MOF via tannic acid etching                                           | Up to 16-fold higher enzymatic activity than the pristine biocatalytic MOFs      | <sup>6</sup> |

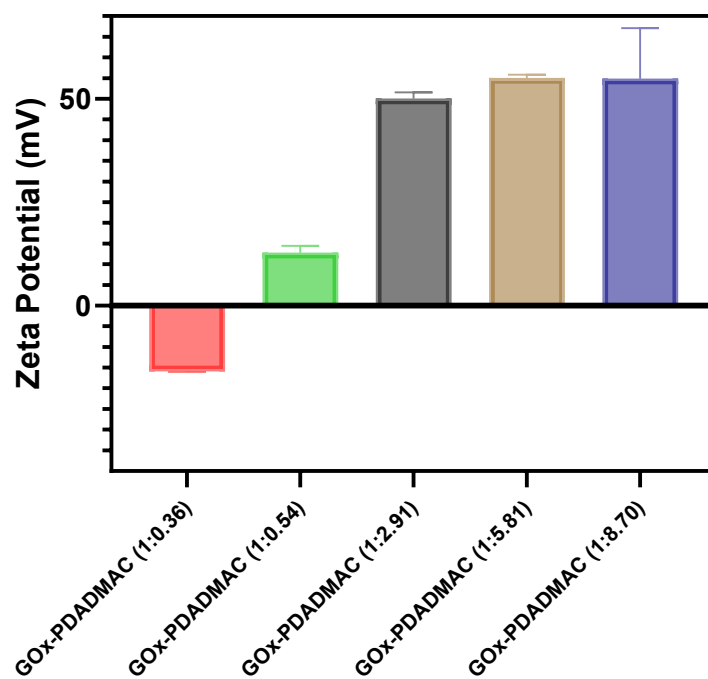

**Figure S1.** Zeta potential analysis of GOx modified with PDADMAC at various molar ratios.

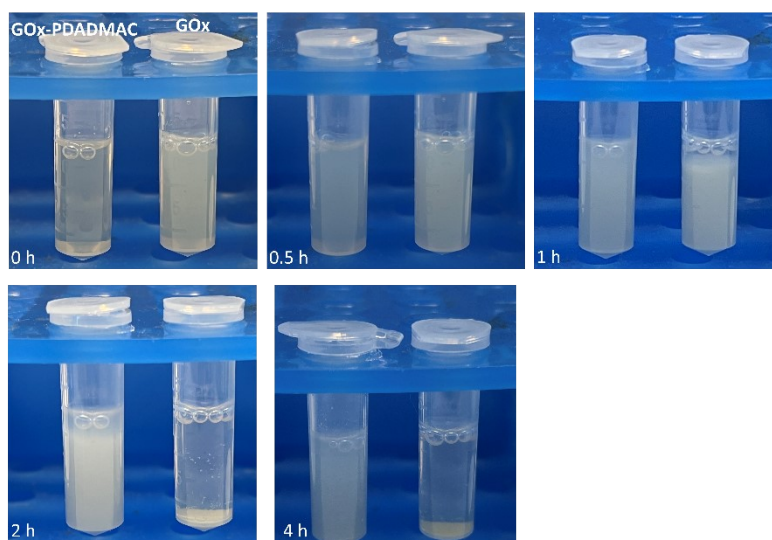

**Figure S2.** Synthesis progress of GOx-PDADMAC/HRP@ZIF-8 (left tube) and GOx/HRP@ZIF-8 (right tube).

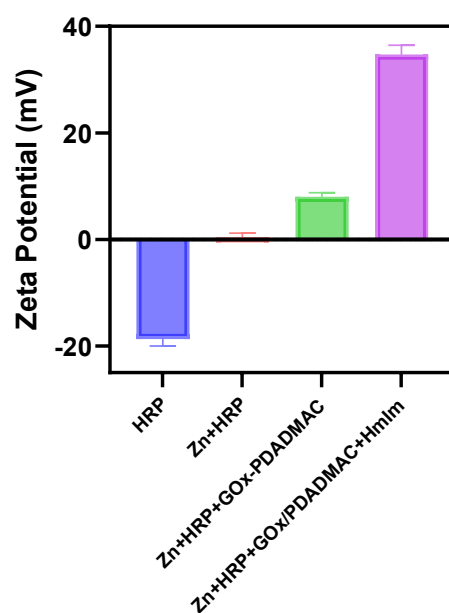

**Figure S3.** Zeta potential change during the synthesis of GO<sub>x</sub>-PDADMAC/HRP@ZIF-8 with the sequential addition of reagents.

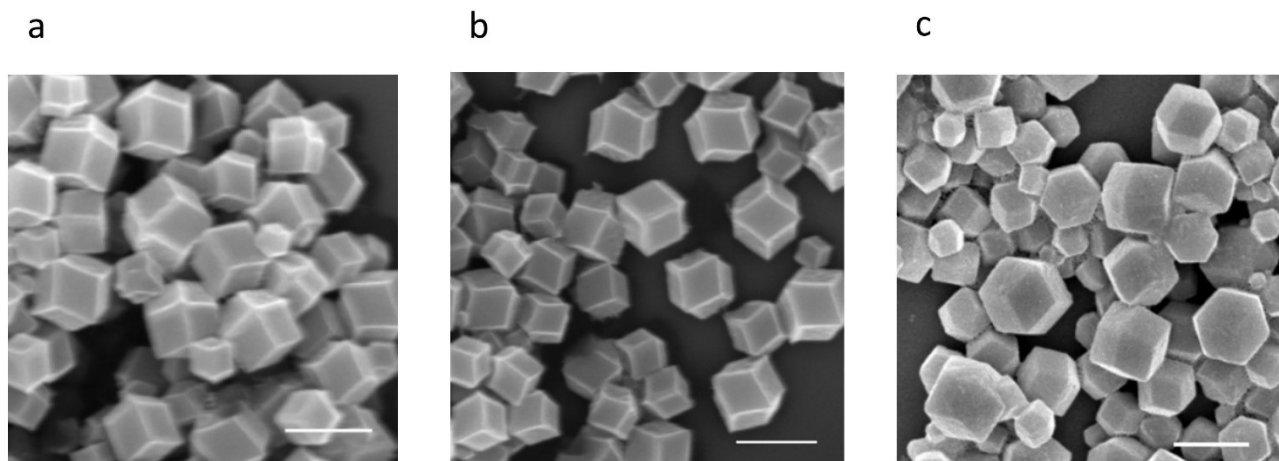

**Figure S4.** SEM images of as-synthesized GO<sub>x</sub>/HRP-PDADMAC@ZIF-8 (a), GO<sub>x</sub>-PDADMAC/HRP@ZIF-8 (b), GO<sub>x</sub>/HRP@ZIF-8 (c). The scale bar in the main images is 1 μm.

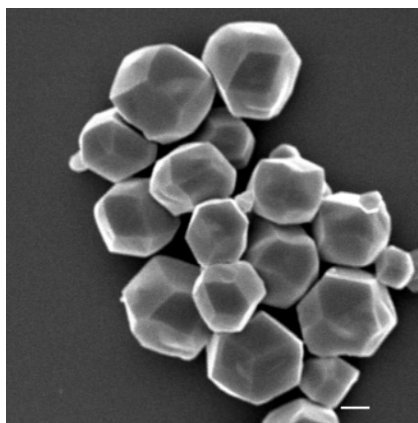

**Figure S5.** SEM images of ZIF-8. The scale bar in the main images is 1  $\mu\text{m}$ .

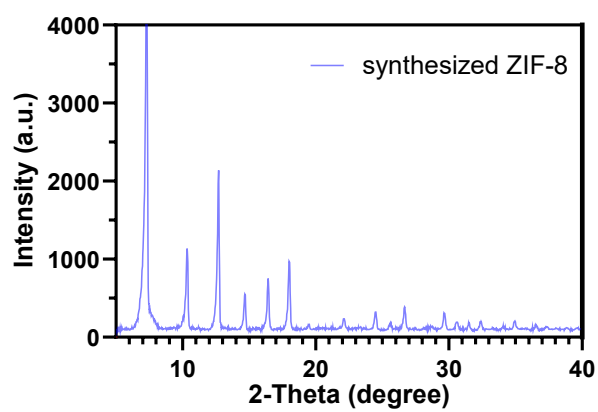

**Figure S6.** XRD pattern of synthesized ZIF-8.



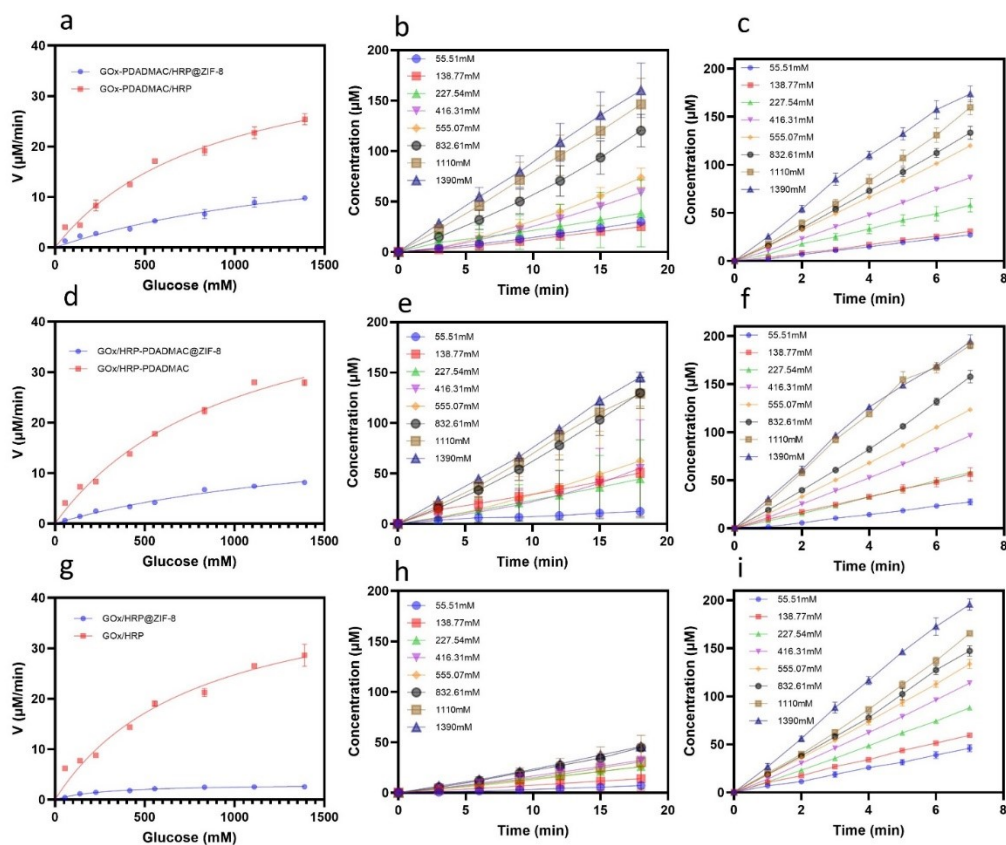

**Figure S7.** Comparison of enzymatic activity between enzyme-MOF samples and their free enzyme counterparts. (a) Plot of reaction velocity,  $V$ , against substrate [glucose] for GOx-PDADMAC/HRP@ZIF-8 and free GOx-PDADMAC/HRP, with (b) and (c) illustrating the DAP change over time at different glucose concentrations for GOx-PDADMAC/HRP@ZIF-8 and GOx-PDADMAC/HRP, respectively. (d) Plot of reaction velocity,  $V$ , against substrate [glucose] for GOx/HRP-PDADMAC@ZIF-8 and free GOx/HRP-PDADMAC, with (e) and (f) illustrating the DAP change over time at different glucose concentrations for GOx/HRP-PDADMAC@ZIF-8 and free GOx/HRP-PDADMAC; while (g) Plot of reaction velocity,  $V$ , against substrate [glucose] for GOx/HRP@ZIF-8 and free GOx/HRP, with (h) and (i) illustrating the DAP change over time at different glucose concentrations for GOx/HRP@ZIF-8 and free GOx/HRP. The same amount of enzymes, based on loading efficiency, was used for the comparison.

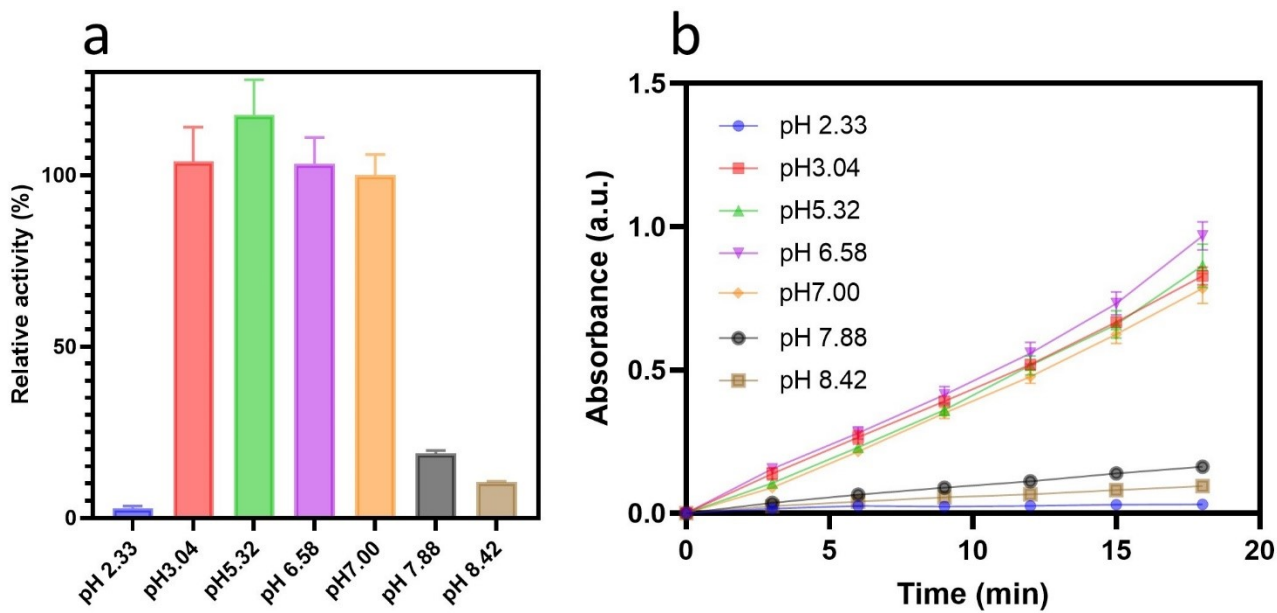

**Figure S8.** The catalytic activity of enzyme-MOF biocomposites across a pH range (pH 2.33 to 8.42).

(a) The relative catalytic activity with neutral pH is normalized to 100%. (b) The change in absorbance over time.

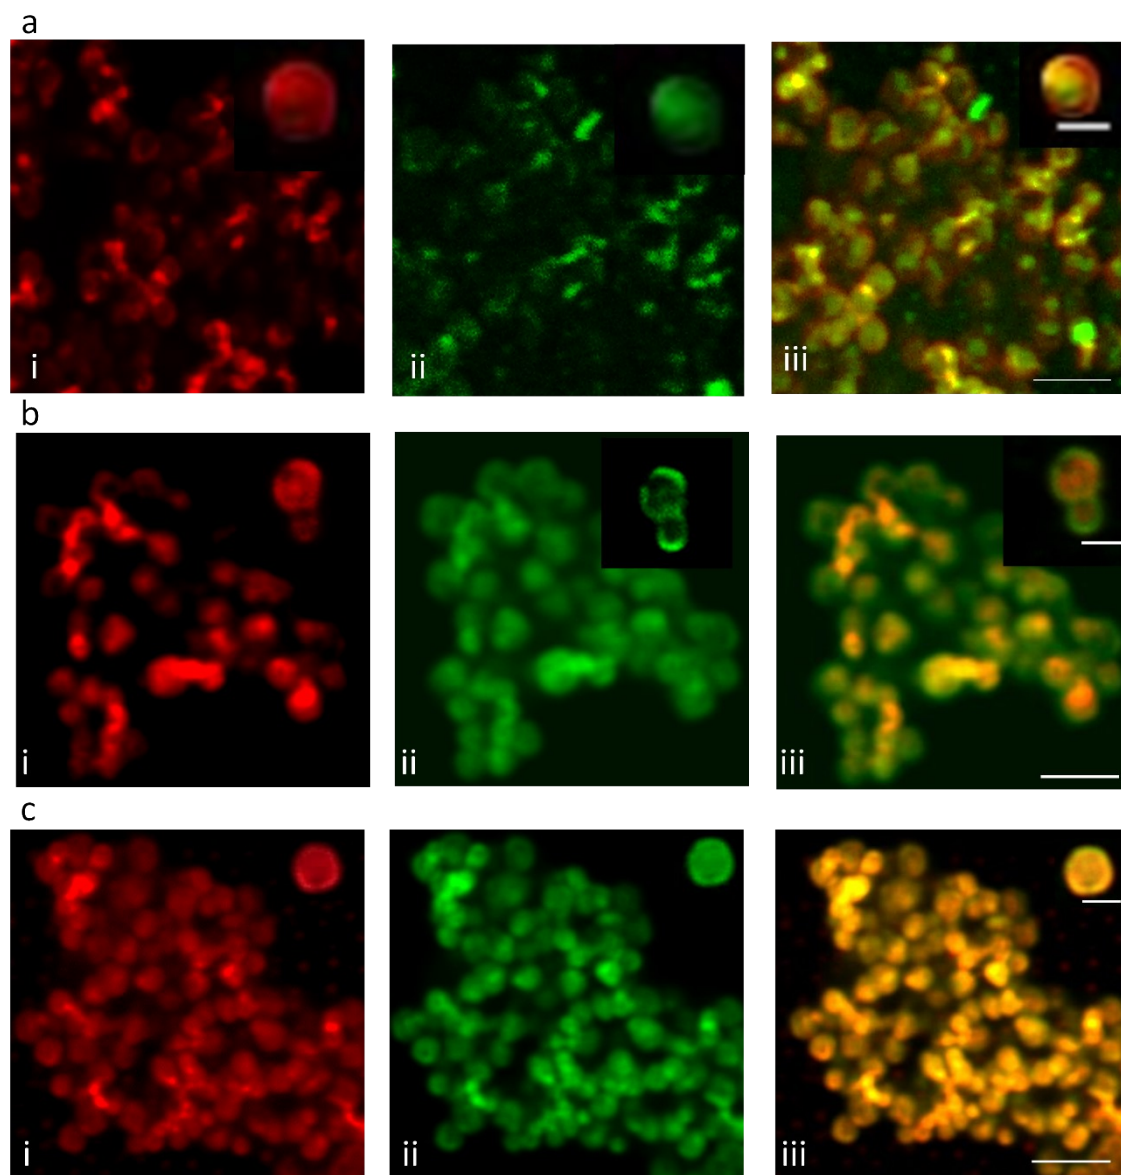

**Figure S9.** CLSM images of (a) GOx-PDADMAC/HRP@ZIF-8, (b) GOx/HRP-PDADMAC@ZIF-8, (c) GOx/HRP@ZIF-8. (i) GOx labeled with ATTO 633 (red), (ii) HRP labeled with ATTO 550 (green), and (iii) are the merged images. The scale bar in the main images is 3  $\mu\text{m}$ , while the scale bar of the insets bar is 1  $\mu\text{m}$ .

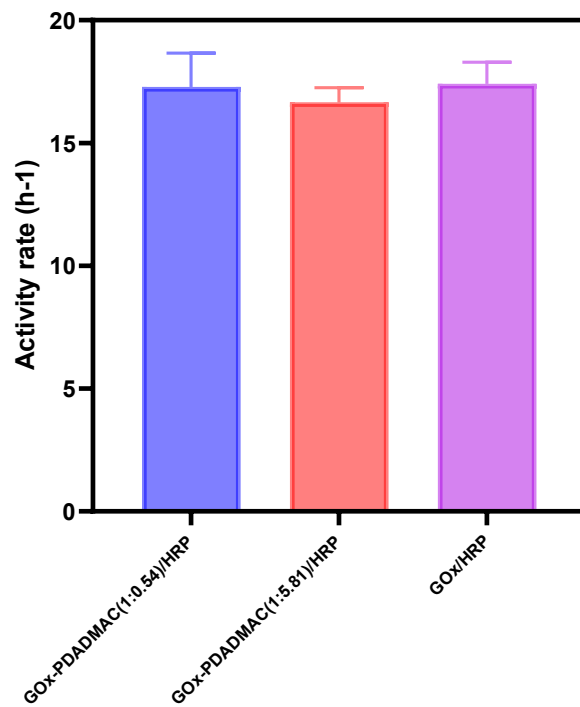

**Figure S10.** Calculated activity rate of GOx-PDADMAC at varying PDADMAC concentrations and free GOx enzyme according to Figure 3d.

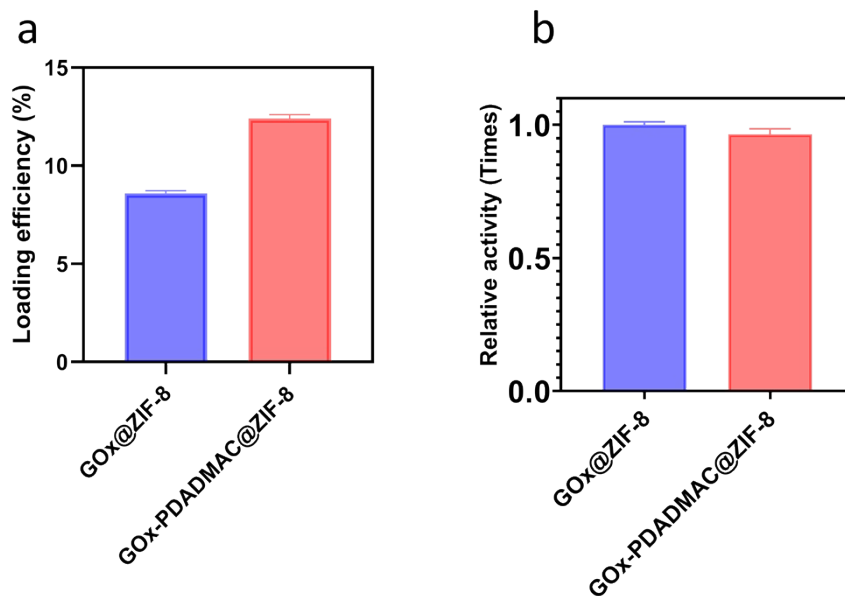

**Figure S11.** GOx loading efficiency in GOx@ZIF-8 and GOx@PDADMAC-ZIF-8 (a). Calculated enzyme activity rate of GOx@ZIF-8 and GOx-PDADMAC@ZIF-8 based on the same amount of GOx in each sample according to Figure 3e.

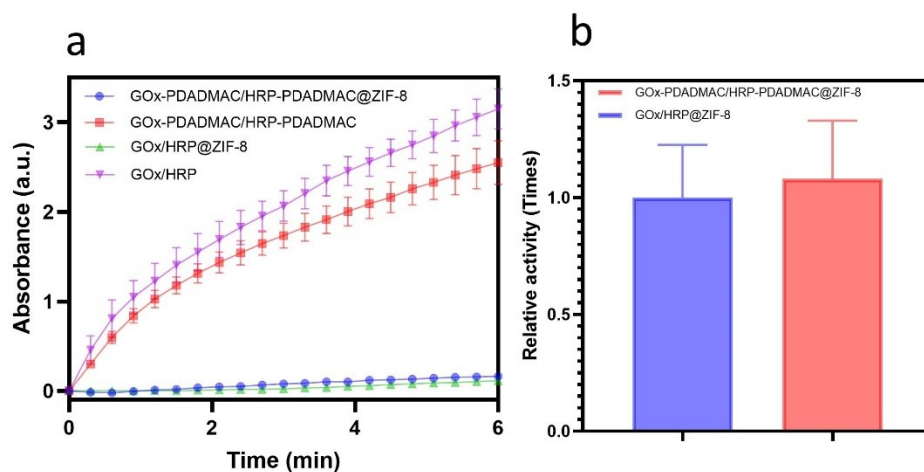

**Figure S12.** The comparison of enzymatic activity GOx-PDADMAC/HRP-PDADMAC@ZIF-8, GOx/HRP@ZIF-8, and their free counterparts. The same amount of enzymes, based on loading efficiency, was used for the comparison. (a) Time-dependent absorbance measurements for each sample. (b) Relative activity comparison between the modified and unmodified enzyme-MOFs.

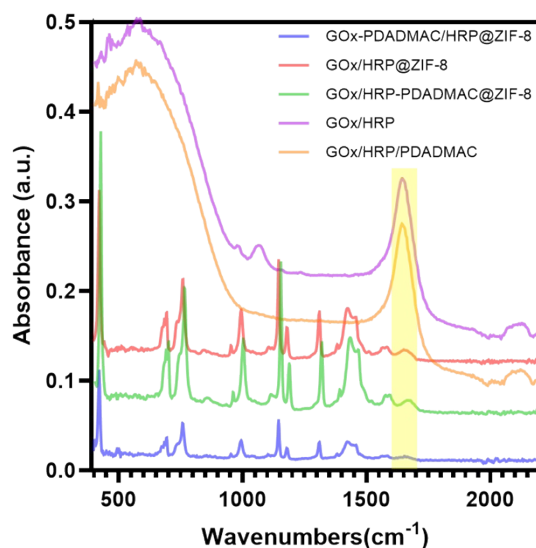

**Figure S13.** FTIR spectra of GOx-PDADMAC/HRP@ZIF-8, GOx/HRP-PDADMAC@ZIF-8, GOx/HRP@ZIF-8, GOx/HRP and GOx/HRP/PDADMAC. Amide I regions (1600-1700  $\text{cm}^{-1}$ ) were used to analyze their tertiary structure.

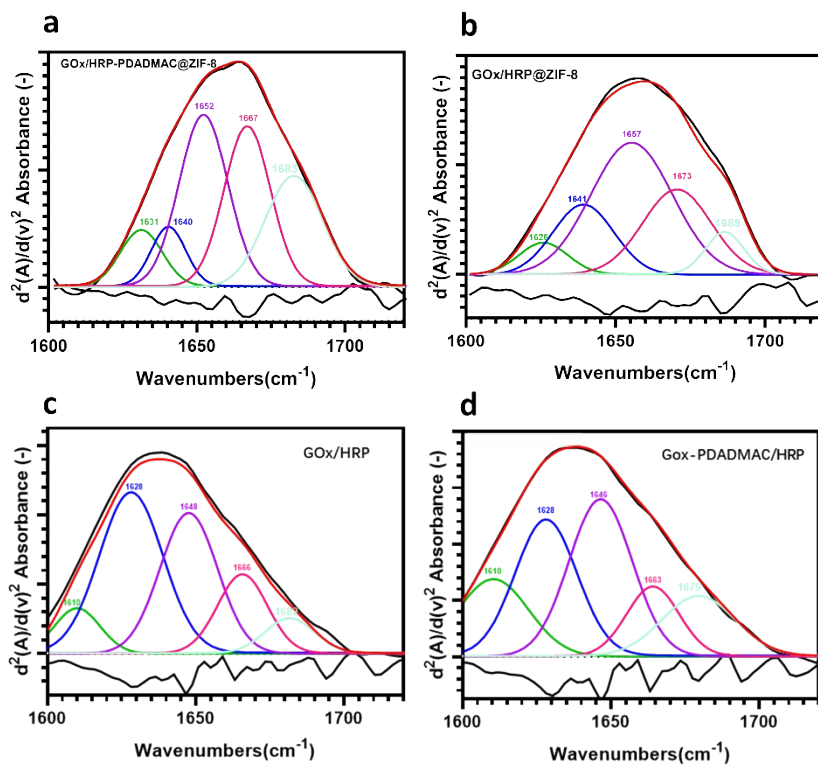

**Figure S14.** Deconvoluted FTIR spectra of the Amide I region (1600-1700  $\text{cm}^{-1}$ ) for GOx/HRP-PDADMAC@ZIF-8 (**a**), GOx/HRP@ZIF-8 (**b**), GOx/HRP (**c**), GOx-PDADMAC/HRP (**d**). The red line represents the simulated fit, the black line indicates the baseline-corrected experimental spectra and the lower black line shows the second derivative of the spectra.

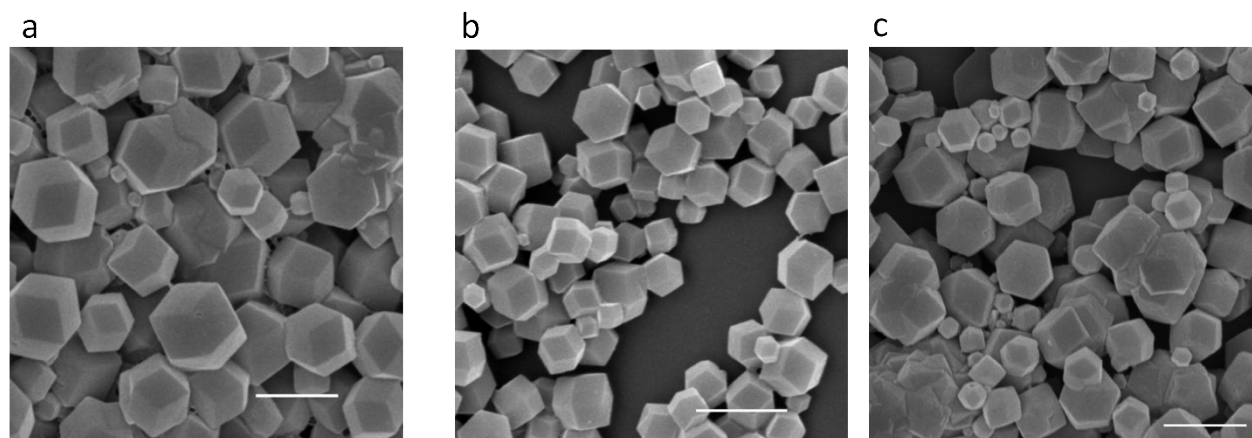

**Figure S15.** SEM images of as-synthesized Pro/GOx-PDADMAC@ZIF-8 **(a)**, Pro-PDADMAC/GOx@ZIF-8 (molar ratio of Pro to PDADMAC is 1: 1.13) **(b)**, Pro/GOx@ZIF-8 **(c)**. The scale bar in the main images is 1 μm.

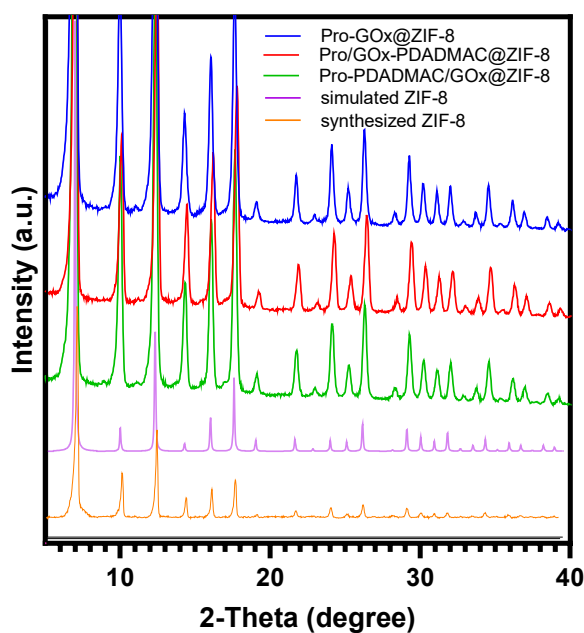

**Figure S16.** XRD patterns of simulated ZIF-8, synthesized ZIF-8, GOx/Pro@ZIF-8, Pro-PDADMAC/GOx@ZIF-8 and Pro/GOx-PDADMAC@ZIF-8.

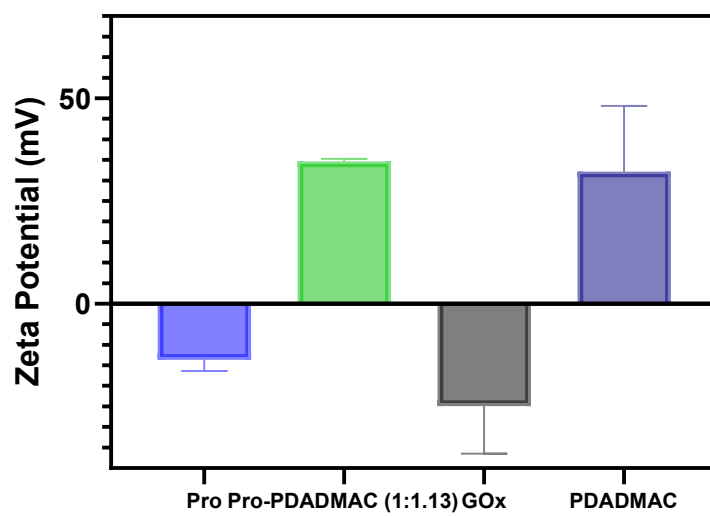

**Figure S17.** Zeta potential analysis of Pro and GOx modified with PDADMAC at various molar ratios



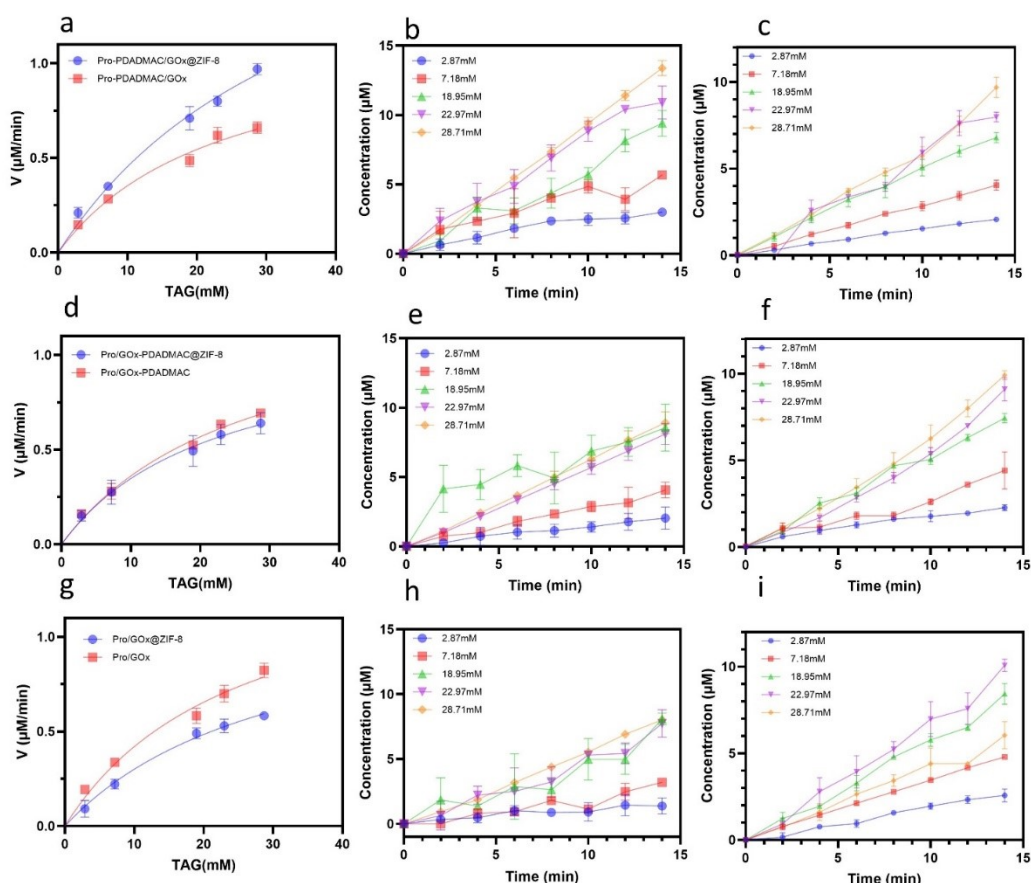

**Figure S18.** Comparison of enzymatic activity between enzyme-MOF samples and their free enzyme counterparts. (a) Plot of reaction velocity,  $V$ , against substrate [1,2,3,4-Tetra-O-acetyl-beta-D-glucopyranose] for Pro-PDADMAC/GOx@ZIF-8 and free Pro-PDADMAC/GOx, with (b) and (c) illustrating the DAP change over time at different substrate concentrations for Pro-PDADMAC/GOx@ZIF-8 and Pro-PDADMAC/GOx, respectively. (d) Plot of reaction velocity,  $V$ , against substrate [1,2,3,4-Tetra-O-acetyl-beta-D-glucopyranose] for Pro/GOx-PDADMAC@ZIF-8 and free Pro/GOx-PDADMAC, with (e) and (f) illustrating the DAP change in over time at different concentrations for Pro/GOx-PDADMAC@ZIF-8 and free Pro/GOx-PDADMAC; while (g) Plot of reaction velocity,  $V$ , against substrate [1,2,3,4-Tetra-O-acetyl-beta-D-glucopyranose] for Pro/GOx@ZIF-8 and free Pro/GOx, with (h) and (i) illustrating the DAP change over time at different concentrations for Pro/GOx@ZIF-8 and free Pro/GOx.

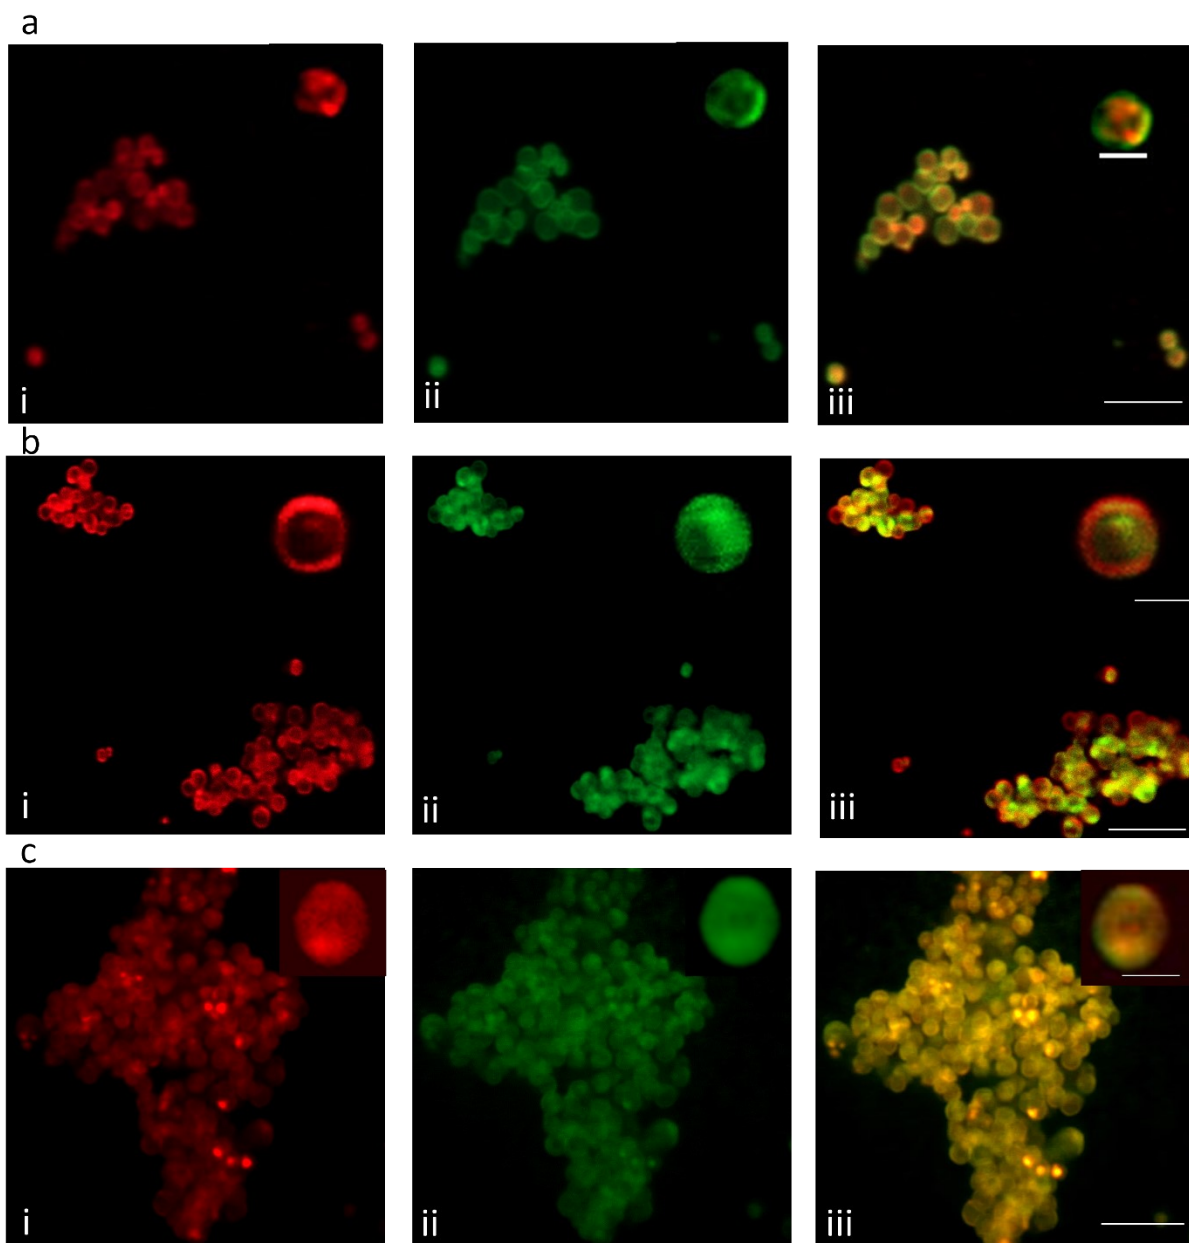

**Figure S19.** CLSM images of (a) Pro-PDADMAC/GOx@ZIF-8, (b) Pro/GOx-PDADMAC@ZIF-8, (c) Pro/GOx@ZIF-8. (i) GOx labeled with ATTO 633 (red), (ii) Pro labeled with ATTO 550 (green), and (iii) are the merged images. The scale bar in the main images is 5 μm, while the scale bar of the insets bar is 500 nm.

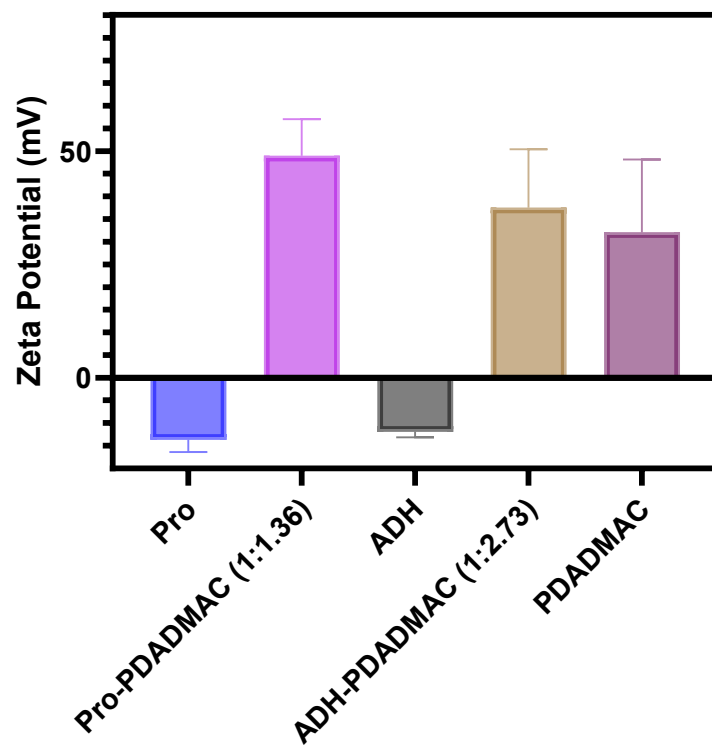

**Figure S20.** Zeta potential of ADH and Pro modified with PDADMAC at different molar ratios.

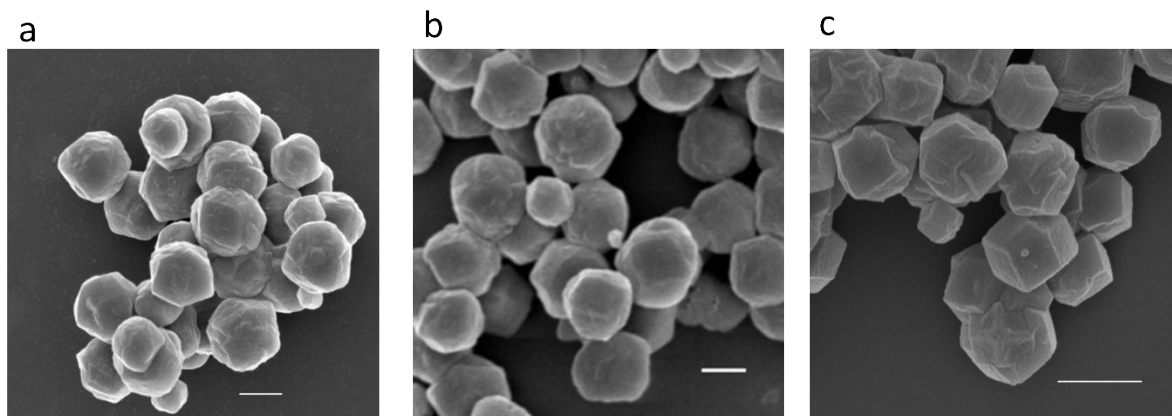

**Figure S21.** SEM images of as-synthesized Pro/ADH-PDADMAC@ZIF-8 **(a)** Pro-PDADMAC/ADH@ZIF-8 (molar ratio of Pro to PDADMAC is 1: 1.36); **(b)** Pro/ADH-PDADMAC @ZIF-8 (molar ratio of ADH to PDADMAC is 1: 12.73); **(c)** Pro-ADH@ZIF-8. The scale bar in the main images is 1  $\mu\text{m}$ .

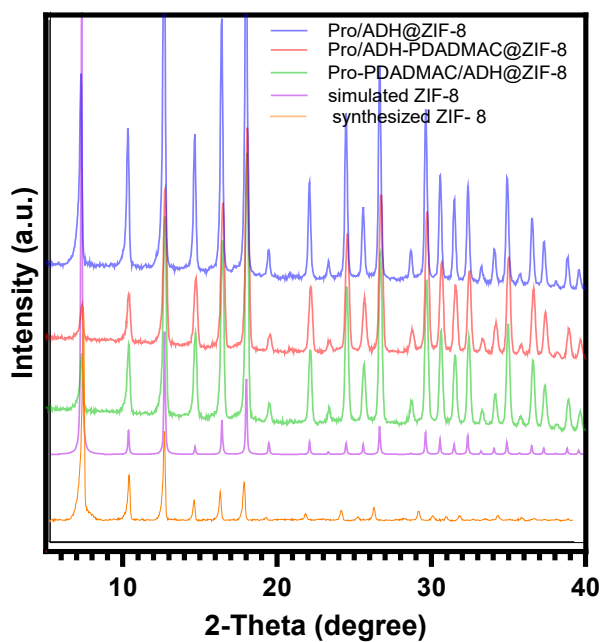

**Figure S22.** XRD patterns of simulated ZIF-8, synthesized ZIF-8, Pro/ADH@ZIF-8, Pro-PDADMAC/ADH@ZIF-8 and Pro/ADH-PDADMAC@ZIF-8.

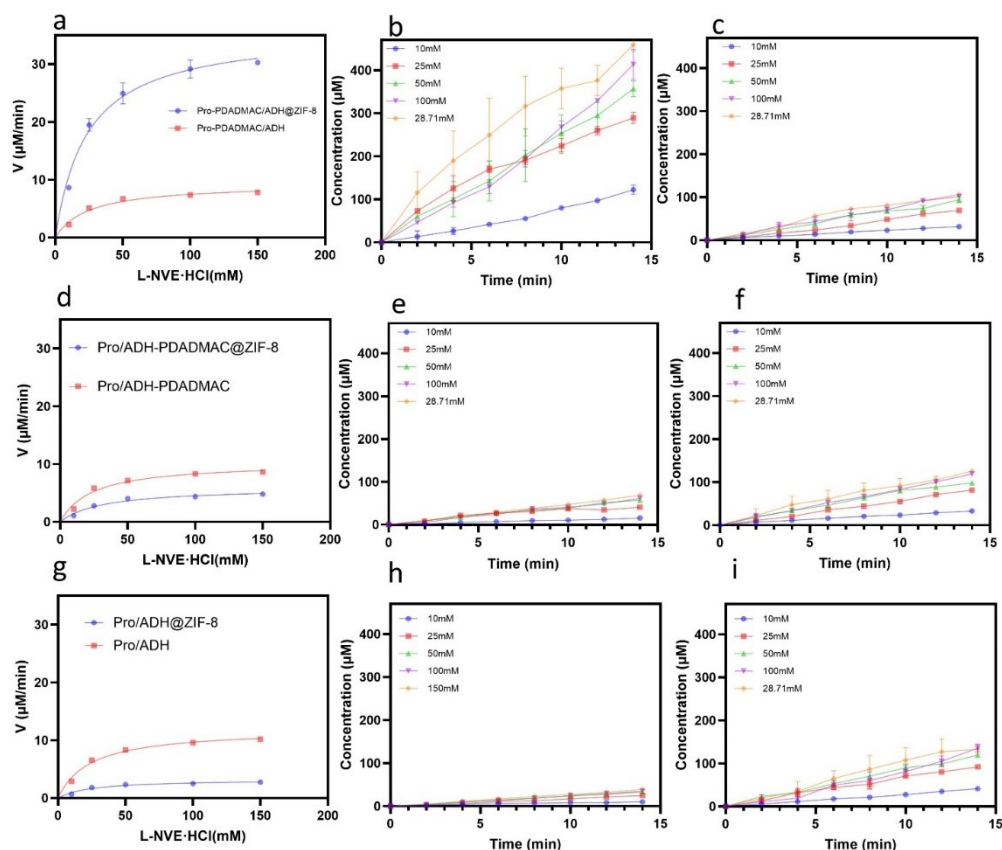

**Figure S23.** Comparison of enzymatic activity between enzyme-MOF samples and their free enzyme counterparts. (a) Plot of reaction velocity,  $V$ , against substrate [L-Norvaline Ethyl Ester] for Pro-PDADMAC/ADH@ZIF-8 and free Pro-PDADMAC/ADH, with (b) and (c) illustrating the NADH change over time at different substrate concentrations for Pro-PDADMAC/ADH@ZIF-8 and Pro-PDADMAC/ADH, respectively. (d) Plot of reaction velocity,  $V$ , against substrate [L-Norvaline Ethyl Ester] for Pro/ADH-PDADMAC@ZIF-8 and free Pro/ADH-PDADMAC, with (e) and (f) illustrating the NADH change over time at different substrate concentrations for Pro/ADH-PDADMAC@ZIF-8 and free Pro/ADH-PDADMAC; while (g) Plot of reaction velocity,  $V$ , against substrate [L-Norvaline Ethyl Ester] for Pro/ADH@ZIF-8 and free Pro/ADH, with (h) and (i) illustrating the NADH change over time at different substrate concentrations for Pro/ADH@ZIF-8 and free Pro/ADH.

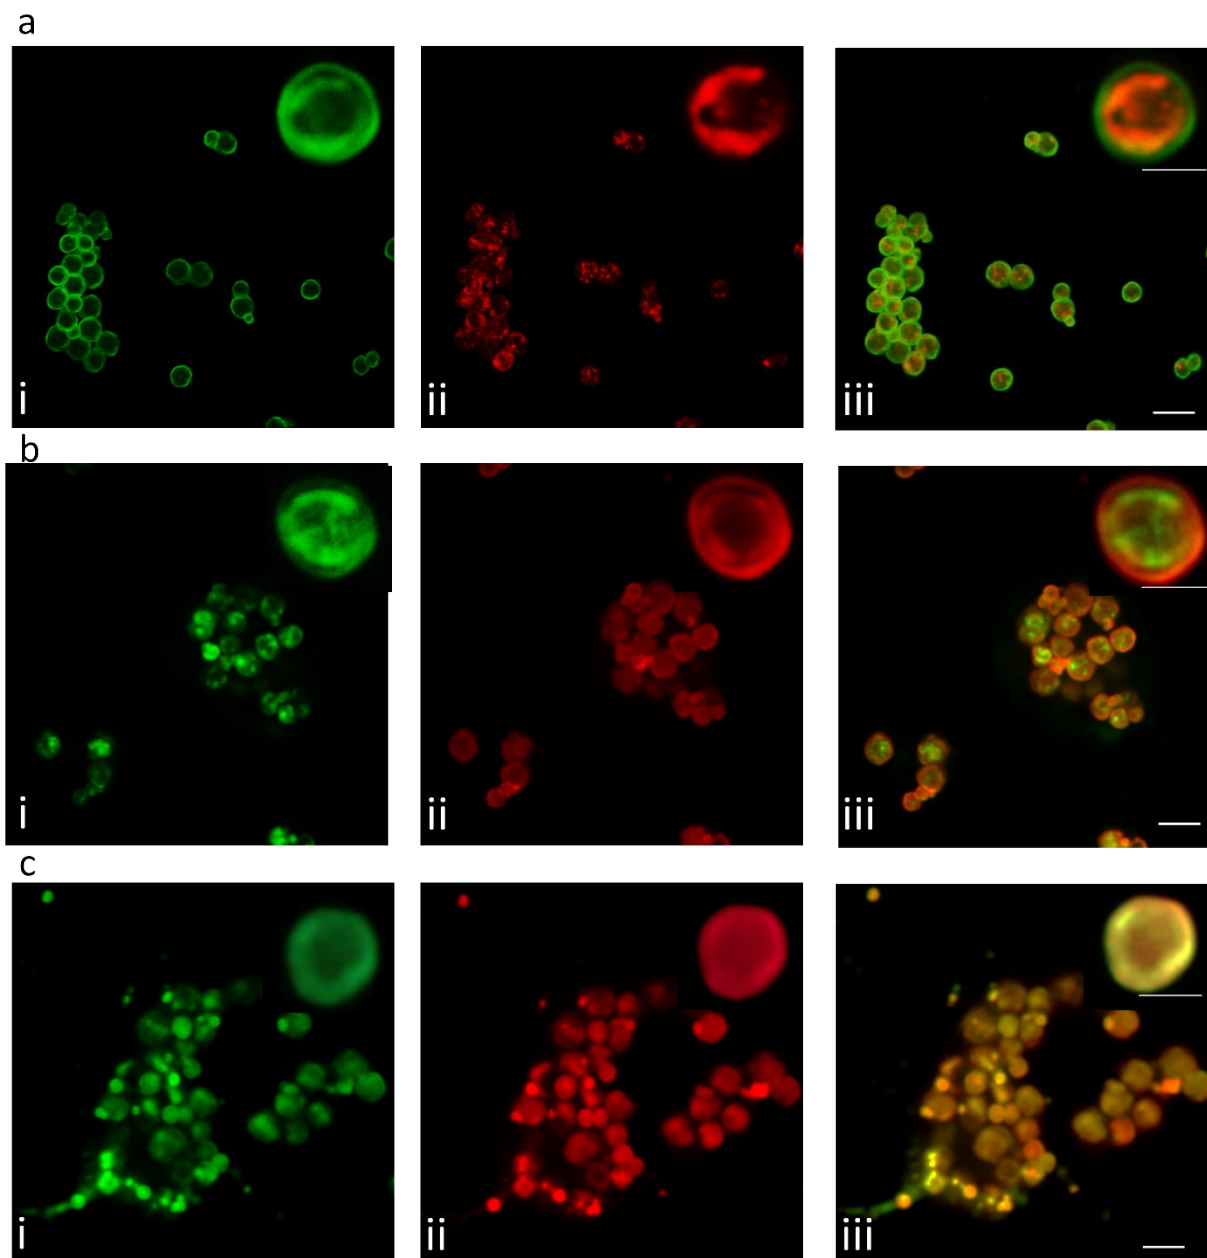

**Figure S24.** CLSM images of (a) Pro-PDADMAC/ADH@ZIF-8; (b) Pro/ADH-PDADMAC@ZIF-8; (c) Pro/ADH@ZIF-8. (i) ADH labeled with ATTO 633 (red), (ii) Pro labeled with ATTO 550 (green), and (iii) are the merged images. The scale bar in the main images is 3 μm, while the scale bar of the insets bar is 500 nm.

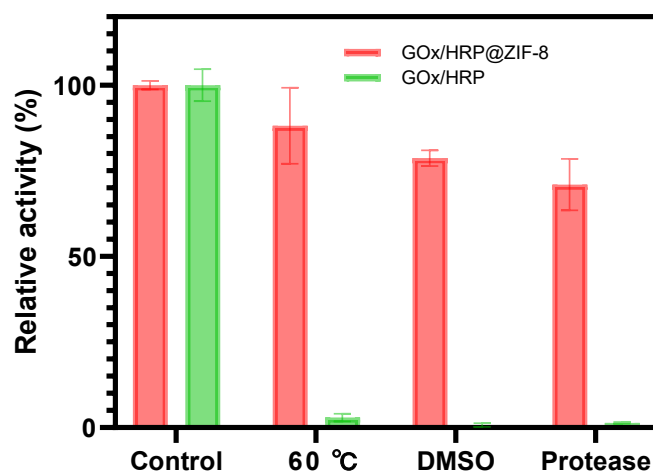

**Figure S25.** Relative enzymatic activities of GOx/HRP@ZIF-8, and free GOx/HRP enzymes under different stress conditions: exposure to 60°C for 1 hour, DMSO for 1 hour, and protease (0.2 mM) treatment for 2 hour.

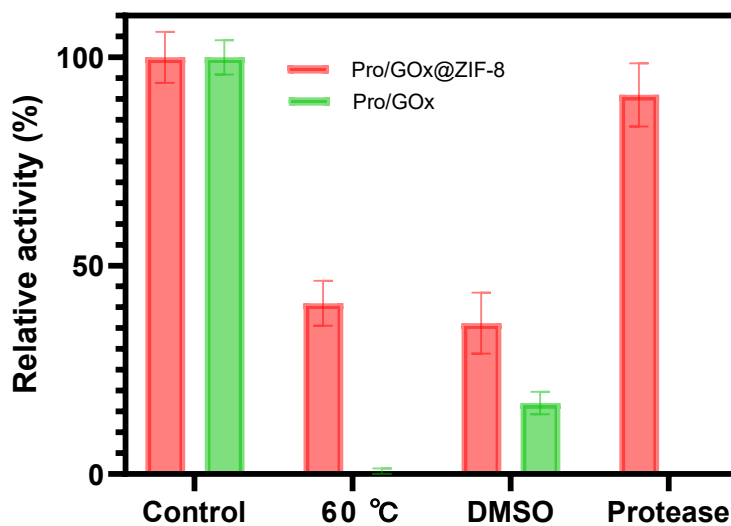

**Figure S26.** Relative enzymatic activities of Pro/GO@ZIF-8, and free GOx/Pro enzymes under different stress conditions: exposure to 60°C for 1 hour, DMSO for 1 hour, and protease (0.2 mM) treatment for 2 hours.

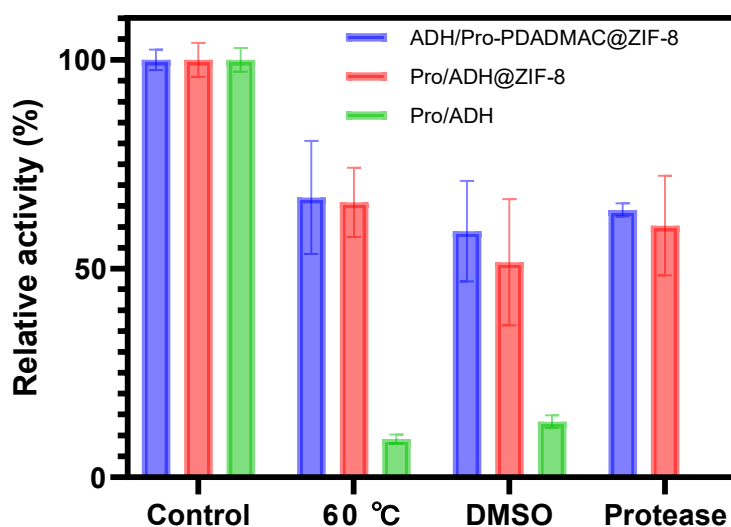

**Figure S27.** Relative enzymatic activities of Pro-PDADMAC/ADH@ZIF-8, Pro/ADH@ZIF-8, and free Pro/ADH enzymes under different stress conditions: exposure to 60°C for 1 hour, DMSO for 1 hour, and protease (0.2 mM) treatment for 2 hours.

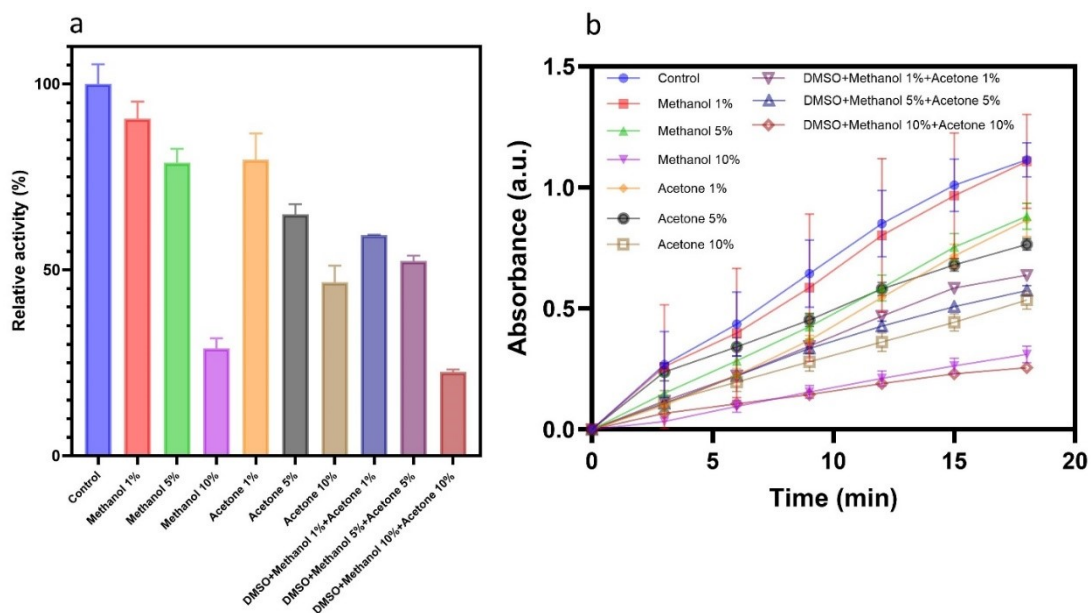

**Figure S28.** The catalytic activity of enzyme-MOF biocomposites in various organic solvents. (a) The relative catalytic activity. (b) The time-dependent absorbance changes across different conditions.



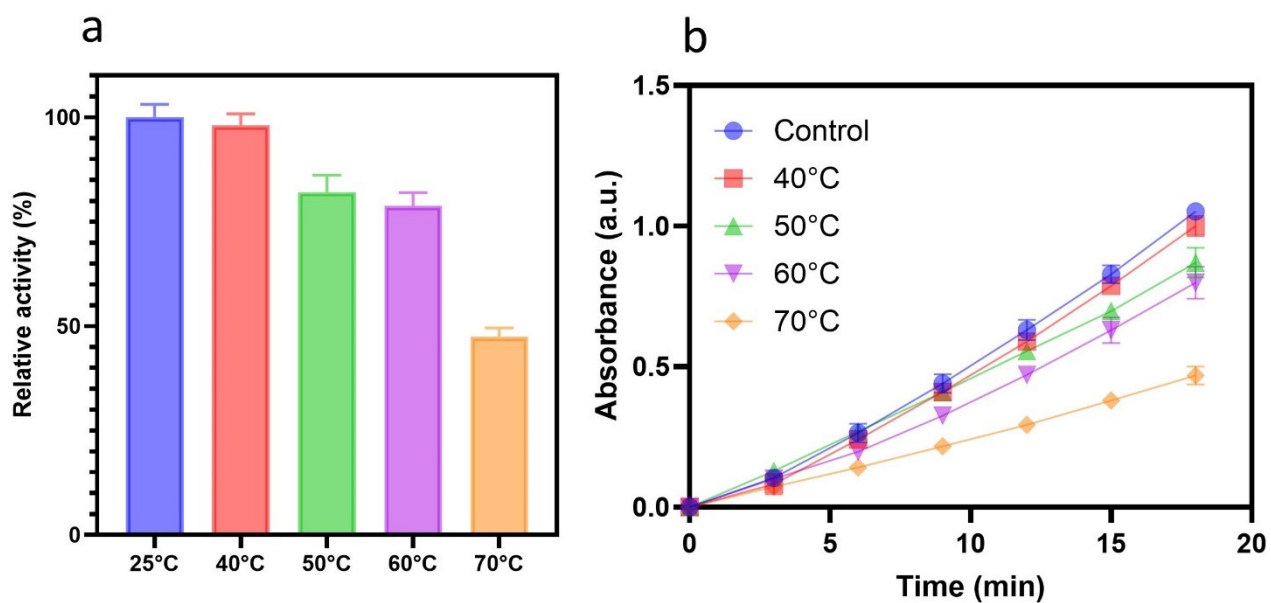

**Figure S29.** Thermal stability of GOx-PDADMAC/HRP@ZIF-8 at different temperatures. (a) Relative activity after incubation for one hour at 25 °C, 40 °C, 50 °C, 60 °C, and 70 °C. (b) Time-dependent absorbance at 420 nm for different temperature conditionS.

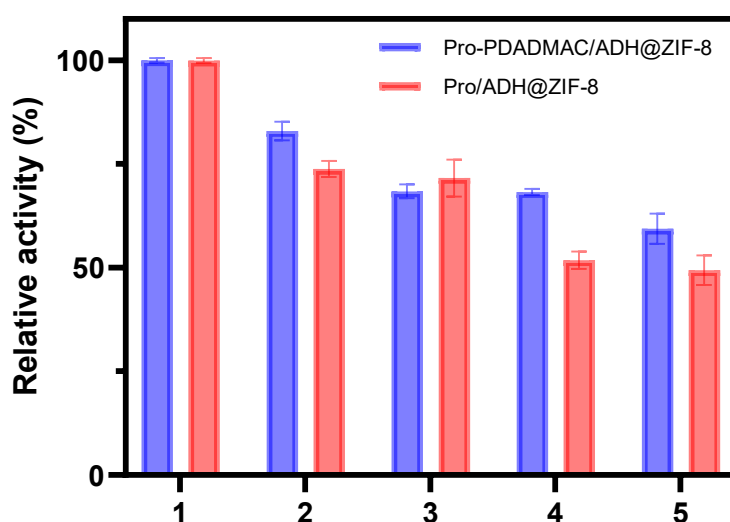

**Figure S30.** Relative activity of Pro-PDADMAC/ADH@ZIF-8 and Pro/ADH@ZIF-8 of catalytic reusability in five consecutive cycles.

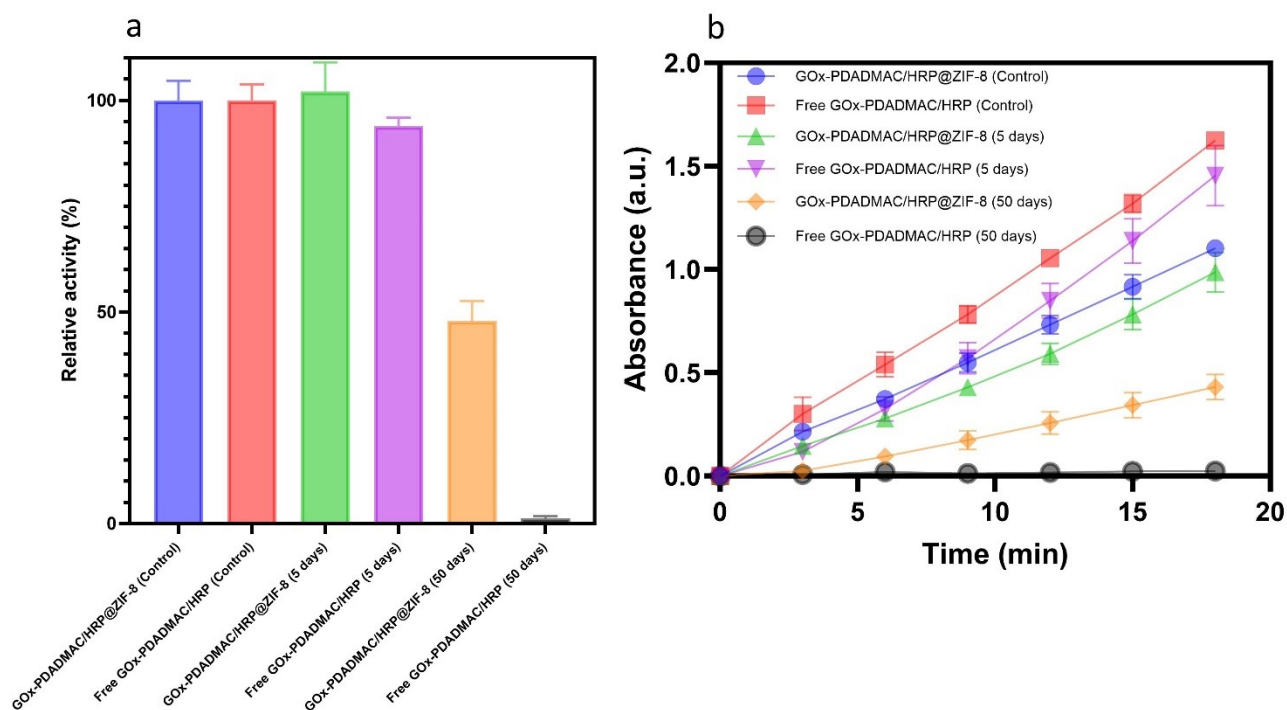

**Figure S31.** The long-term stability of enzyme-MOF biocomposites stored at 4 °C for 5 days and 50 days. (a) Their relative catalytic activity. (b) The change in absorbance over time at different storage durations.

## Reference

1. Z. Xu, G. Xiao, H. Li, Y. Shen, J. Zhang, T. Pan, X. Chen, B. Zheng, J. Wu and S. Li, *Adv. Funct. Mater.*, 2018, **28**, 1802479.
2. T. Man, C. Xu, X.-Y. Liu, D. Li, C.-K. Tsung, H. Pei, Y. Wan and L. Li, *Nat. Commun.*, 2022, **13**, 305.
3. J. Liang, F. Mazur, C. Tang, X. Ning, R. Chandrawati and K. Liang, *Chem. Sci.*, 2019, **10**, 7852-7858.
4. C. Hu, Y. Bai, M. Hou, Y. Wang, L. Wang, X. Cao, C.-W. Chan, H. Sun, W. Li and J. Ge, *Sci. Adv.*, 2020, **6**, eaax5785.
5. Q. Wang, M. Chen, C. Xiong, X. Zhu, C. Chen, F. Zhou, Y. Dong, Y. Wang, J. Xu and Y. Li, *Biosens. Bioelectron.*, 2022, **196**, 113695.
6. J. Liang, S. Gao, J. Liu, M. Y. B. Zulkifli, J. Xu, J. Scott, V. Chen, J. Shi, A. Rawal and K. Liang, *Angew. Chem. Int. Ed.*, 2021, **60**, 5421-5428.
